**Validation of Emotional Stimuli Flashcards for Conducting ‘Response to Reward’ fMRI  
study among Malaysian students**

Nisha Syed Nasser<sup>1,2</sup>, Hamed Sharifat<sup>1</sup>, Aida Abdul Rashid<sup>2</sup>, Suzana Ab Hamid<sup>2</sup>, Ezamin Abdul  
Rahim<sup>2</sup>, Mazlyfarina Mohamad<sup>3</sup>, Rohit Tyagi<sup>4</sup>, Siti Irma Fadhilah Ismail<sup>5</sup>, Ching Siew Mooi<sup>6</sup>,  
Subapriya Suppiah<sup>1,2\*</sup>

<sup>1</sup>*Centre for Diagnostic Nuclear Imaging, Faculty of Medicine and Health Sciences, Universiti  
Putra Malaysia, Malaysia*

<sup>2</sup>*Department of Imaging, Faculty of Medicine and Health Sciences, Universiti Putra Malaysia,  
Malaysia*

<sup>3</sup>*Department of Diagnostic Imaging and Radiotherapy Programme, Faculty of Health Sciences,  
Universiti Kebangsaan Malaysia, Malaysia*

<sup>4</sup>*Aerobe Pte. Ltd, Singapore*

<sup>5</sup>*Department of Psychiatry, Faculty of Medicine and Health Sciences, Universiti Putra Malaysia,  
43400 Serdang, Selangor, Malaysia*

<sup>6</sup>*Department of Family Medicine, Faculty of Medicine and Health Sciences, Universiti Putra  
Malaysia, 43400 Serdang, Selangor, Malaysia*

*\*Corresponding author: [subapriya@upm.edu.my](mailto:subapriya@upm.edu.my)*

## Abstract

Problematic Instagram Use (PIGU) is a type of behavioural addiction (BA), and is one of the types of specific-Internet-addiction disorders in Malaysia. Most studies have relied on questionnaire-based assessment e.g. Smartphone Addiction Scale-Malay version (SAS-M) and modified Instagram Addiction Test (IGAT), to establish commonalities between PIGU and other BA and substance use disorders (SUDs), albeit lacking in neurobiological evidence to support the hypothesis. Advantageously, fMRI neuroimaging technique can objectively assess regional brain activation in response to addiction-specific rewards. To date, there is no local database with addiction-specific cues pertaining to PIGU that can elicit robust brain activations and portray similar neurobiological mechanisms as shown in SUDs. **Objective:** We aimed to conduct an out-of-scanner validation study to create a database of pictures using 'Risky' and 'Neutral' cues that can evoke emotional responses of cravings among PIGUs. **Method:** Forty-four Malaysian undergraduate students (20 PIGUs, 24 controls) were selected via simple random sampling and administered a set of 200 pictures to score their affective ratings. The ratings were based on valence, arousal, and approach–avoidance dimensions using a 9-point Likert scale. **Results:** PIGUs viewing 'Risky' cues demonstrated significant positive correlations between arousal & valence ( $z = 4.834$ ,  $p < .001$ , effect size = 0.69) and arousal & avoidance-approach ( $z = 4.625$ ,  $p < .001$ , effect size = 0.66) as compared to controls. Forty images were optimally scored and validated for the database. **Conclusion:** A database of validated addiction-specific pictures can elicit cravings and motivation to approach among PIGUs, potentiating future cue-induced reactivity fMRI studies.

**Keywords:** Addiction, Affective ratings, Cravings, Picture database, Reward

## Introduction

Problematic Instagram Use (PIGU) is a behavioural addiction (BA) and considered as a type of specific-Internet-addiction, which is associated with cravings and overdependence of using the Instagram application despite experiencing deterioration in activities of daily living among the addicted individual (Billieux 2012; Brand et al. 2016). To be precise, addiction is defined as a compulsive behaviour associated with continued indulgence in pleasure-seeking activities with no desire to give up, despite the detrimental effects (Volkow et al. 2016). Addiction may be due to substance use disorders (SUDs) such as cannabis, tobacco, alcohol, hallucinogens, sedatives, caffeine, opioids, hypnotics, and anxiolytics; or abnormal behaviours such as pathological gambling, preoccupation with the Internet, online gaming, and social networking (American Psychiatric Association 2013).

Instagram use among Malaysians has increased exponentially in the past decade giving rise to problematic behaviours related to its use.(Khalid et al. 2018) Most studies have relied on questionnaire-based assessment e.g. Smartphone Addiction Scale-Malay version (SAS-M) and modified Instagram Addiction Test (IGAT) (Ching et al. 2015; Syed Nasser, Loh, et al. 2019) to establish commonalities between PIGU and other BA and SUDs, albeit lacking in neurobiological evidence to support the hypothesis. Advantageously, functional magnetic resonance imaging (fMRI) neuroimaging technique can objectively assess regional brain activation in response to addiction-specific rewards.

By utilising fMRI it is possible to illustrate *in vivo* brain activations in 'Response to Reward' conditions (Sun et al. 2012; Kim et al. 2014; Zhang et al. 2016). Task-based fMRI employs Blood

Oxygen Level Dependent Imaging (BOLD) to measure the hemodynamic response function (HRF) i.e., outshoot of oxygenated blood to local brain areas that are activated during tasks such as viewing pictures, videos, decision-making in the cerebral cortex (Glover 2011; Sharifat et al. 2018; Lindquist et al. 2009; Huettel et al. 2014). This is particularly pertinent as according to the ‘Incentive sensitization theory of addiction’, attention bias and pathological motivation toward addiction-related cues such as pictures, movies, and words tended to elicit higher levels of arousal/cravings in addicted individuals (Robinson and Berridge 2008).

Capra (1996), defined a paradigm as "a group of values, concepts, perceptions and practices that are shared by a community, which forms a unique vision of reality that is the foundation of the way a community organizes itself". Paradigms are used to investigate the individual differences, group behavior, organizational behavior, human factors, and cognitive behavior among a group of subjects. In specific, an experimental fMRI paradigm refers to a temporal allocation of stimuli to obtain good BOLD activations by employing sensory cues e.g. emotional visual stimuli; that are embedded in a block or event-related design to evoke HRF in the subjects (James et al. 2014). Designing a proper fMRI paradigm enables the researcher to achieve a good response accuracy and subsequently, identify regional brain activations in response to the stimulus being presented.

Increased craving or euphoria in an addicted subject can be studied by cue-reactivity paradigms using emotional visual cues to elicit craving during reward anticipation or ‘Response to Reward’ during reward delivery among the pathological users; as compared to the control group. It is one of the widely employed paradigms to evoke and evaluate craving for pathological gambling, Internet addiction, smartphone addiction, and pathological Instagram and Facebook usage

(Chakraborty 2016; Sherman et al. 2018; Ko et al. 2009; Niu et al. 2016; Brand et al. 2016; Syed Nasser, Loh, et al. 2019). A relatively new parameter with regards to the study of PIGU is the study of emotions. The exact nature of emotional motivational states in PIGU has not yet been adequately understood. Emotional stimuli are characterized by dimensions such as, arousal, approach-avoidance (Motivational direction) and valence to describe human perception of physical properties of the stimuli. Valence describes the feeling of pleasure in terms of positive or negative feelings evoked by the visual cues. Arousal is a physiological activity ranging from aroused/excited to unaroused/relaxed. Motivational direction refers to the directional aspect of the behavior i.e., whether the respondent will decide to move towards/approach the stimuli or move away/avoid that stimuli (Feldman-Barrett et al. 2006; Mauss and Robinson 2009). We hypothesize that negative emotional pictures act as rewarding visual cues that can effectually modulate emotional experience among PIGU. Hence, appropriate emotional cues for neuroimaging studies can be selected based on the ratings of these dimensional categories.

Validated flashcard sets or image databases are invaluable for a good cue-induced reactivity study. Although the availability of standardized databases such as the International Affective Picture System, and the Geneva Affective Picture Database that contain emotionally charged stimuli cannot be denied, there is no particular database pertaining to Smartphone-linked Instagram addiction; thus lacking appropriate images for potential future cue-induced fMRI studies to evaluate the 'Response to Reward' condition among smartphone addicts particularly in the domain of social networking applications such as Instagram.

To date, there is no local database with addiction-specific cues pertaining to PIGU that can elicit

robust brain activations and portray similar neurobiological mechanisms as shown in SUDs. The main objective of this study is to validate a set of flashcards that can induce ‘Negative Emotional Valence’ and can potentially elicit brain activations in PIGU subjects. We aimed to create a database of ‘Neutral’ cues as a baseline and ‘Negative Emotional’ cues as the rewarding cues for future fMRI studies pertaining to PIGU. This validation study was designed and modified based on the method used by the Nencki Affective Picture System (NAPS) (Marchewka et al. 2014).

### **Materials and Methods**

We modified Sherman’s method on the assessment of the power of ‘likes’ to evaluate the ‘Response to Reward’ condition employing negative emotional stimuli and ‘Neutral’ cues (Sherman et al. 2016). The pictures for this current study were selected from publicly available Instagram accounts after receiving approval from the account holders. The pictures were collected and classified into two categories (‘Negative Emotional’ cues and ‘Neutral’ cues). The former category included photographs such as ‘selfies’ taken from heights, taking photos while driving, loss of an interpersonal relationship and photos that were taken while doing dangerous and risky stunts. The latter category included pictures of landscapes, plants, trees, and object photographs in a gray scale background. Grayscale images provide very little information and elicit less interest compared to coloured images, hence it can reduced the involvement of the human visual system in extracting information from the images (Kather et al. 2017).

The initial classification of pictures into the selected categories was made by the principal team members (NSN, HS, AAR, SS). The selected images were then shown to 3 independent consultants (CSM, SIF, MFM), who gave their impartial opinion on the images by consensus. They acted as

impartial judges to classify the pictures into 2 categories. Very bright, colorful pictures that provoked any positive emotions or a feeling of arousal were excluded under the 'Neutral' category. 'Negative Emotional' cues depicting photos taken in religious or sacred places were excluded to avoid any disputes. Any blurred photographs from both categories were excluded. At the beginning of the study we had 300 pictures, out of which 100 'Neural' pictures and 100 'Negative Emotional' pictures were selected. In approximately 99% of the cases, all of the judges classified the pictures into the same category (Cronbach's  $\alpha = .99$ ). The finalized pictures (n=200), were then processed for the specifications of an fMRI paradigm. The pictures were resized and cropped to the specification of 600 x 400 with a resolution of 300 dpi using the freely available software, 'Irfan View' (sourced from <https://www.irfanview.com/>). The pictures were using JPEG file format.

### **Participants**

After acquiring ethical clearance from the local institutional committee (JKEUPM) (UPM/TNCPI/RMC/1.4.18.2), a validation study was conducted among 44 undergraduate students, 20 PIGU (16 girls, 4 boys; mean age 22.05 years) and 24 control subjects (18 girls, 6 boys; mean age 21.75 years) from Universiti Putra Malaysia. The subjects were recruited based on the evaluation of the online smartphone addiction scale - Malay version questionnaire (SAS-M) and the modified IGAT. Based on the recommended cut-off scores, subjects who attained a total score of  $\geq 98$  on SAS-M and  $\geq 37$  on the modified IGAT were considered as PIGU. Conversely, those with a lower score from the cutoff values were categorized as controls. Recruitment of participants for the study was made by advertising in the student portals and via communication with lecturers across all the faculties in Universiti Putra Malaysia (UPM). Responding participants were undergraduate students from various faculties in UPM and were selected by simple random

sampling. Informed consent was obtained from all individual participants and the study abided by the rules advocated by the Declaration of Helsinki 1964.

### **Rating scales and stimuli presentation**

Prior to the commencement of the study, a briefing session was conducted among the study participants. The participants were instructed to answer the questions honestly and without discussing it with other people. The stimuli from both the categories were presented alternatively; with the limitation that no more than three stimuli from each category were presented in consecutive succession. The participants were instructed to view each picture for 3s and then respond to the 3 sub-questions related to emotional valence, motivation and arousal, for a duration of 3s each (see Figure 1).

We used an online picture evaluation method to rate our flashcards on a 9 point rating scale. The participant had to complete the sentence on the valence scale as “You are judging this image as ...” (from 1 = very negative to 9 = very positive, with 5 = ‘Neutral’). Secondly the participants judged the motivational direction by completing the sentence, “My reaction to this image is ...” (from 1 = to avoid to 9 = to approach, with 5 = ‘Neutral’). Finally, participants judged the degree of arousal elicited by the pictures with the introductory sentence, “Confronted with this image, you are feeling: ...” (From 1 = relaxed to 9 = aroused, with 5 = ‘Neutral’/ambivalent). The duration of the study was 45 minutes. The validation form was emailed to the participants and the responses were obtained via an online link. All responses were further analyzed using the statistical package SPSS version 22.



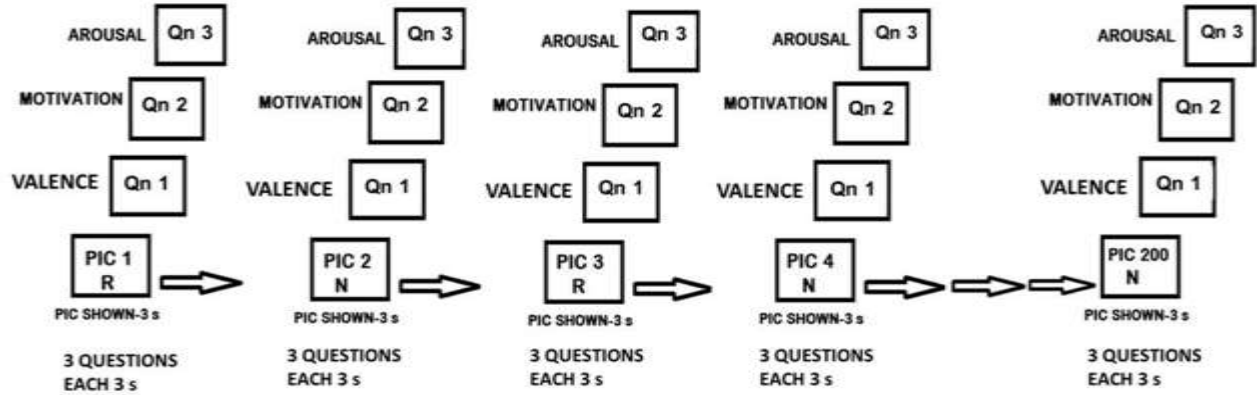

**Figure 1. Stimuli presentation - off-scanner paradigm**

## Results

The ratings and descriptive statistics for the dimensions and pictures in each category by groups are presented in Table 1 and Table 2. PIGU and control groups showed differing emotional responses to the ‘Negative Emotional’ cues. Within the PIGU group, the ‘Negative Emotional’ cues elicited a positive feeling and they got aroused and preferred to approach those pictures. Whereas, the control group, although aroused by the ‘Negative Emotional’ cues, preferred to respond by avoiding those pictures. Both groups rated the ‘Neutral’ cues as pleasant and relaxing/un-arousing and were apt to approach those pictures.

**Table 1. Different dimensions in the target groups for ‘Negative Emotional’ and ‘Neutral’ pictures combined**

| <b>Group/dimension</b> | <b>Minimum</b> | <b>Maximum</b> | <b>Mean</b> | <b>SD</b> |
|------------------------|----------------|----------------|-------------|-----------|
| <b>PIGU: A</b>         | 2.60           | 7.50           | 5.583       | 0.986     |
| <b>PIGU: B</b>         | 2.45           | 7.35           | 5.420       | 0.987     |
| <b>PIGU: C</b>         | 3.65           | 6.80           | 5.187       | 0.629     |
| <b>CG: A</b>           | 2.67           | 7.63           | 5.369       | 1.256     |
| <b>CG: B</b>           | 2.50           | 7.58           | 5.299       | 1.322     |
| <b>CG: C</b>           | 2.83           | 7.13           | 4.87        | 1.046     |
| <b>Both groups: A</b>  | 2.60           | 7.63           | 5.476       | 1.133     |
| <b>Both groups: B</b>  | 2.45           | 7.58           | 5.360       | 1.167     |
| <b>Both groups: C</b>  | 2.83           | 7.13           | 5.028       | 0.876     |

CG: Control Group; SD: Standard Deviation; A: Valence; B: Approach-Avoidance C: Arousal

**Table 2. Descriptive statistics calculated separately for each dimension and category in the target groups**

| Category                    |                | PIGU group |          |          | Control group |           |           |
|-----------------------------|----------------|------------|----------|----------|---------------|-----------|-----------|
|                             |                | A          | B        | C        | A             | B         | C         |
| <b>'Negative Emotional'</b> | <b>Mean</b>    | ± 5.005    | ± 4.83   | ± 5.60   | ± 4.445       | ± 4.304   | ± 5.697   |
|                             | <b>SD</b>      | 0.945      | 0.941    | 0.480    | 1.020         | 1.020     | 0.643     |
|                             | <b>Min-Max</b> | 2.60-7.1   | 2.45-7.1 | 3.9-6.8  | 2.67-7.21     | 2.5-7.08  | 3.83-7.13 |
|                             | <b>N</b>       | 100        | 100      | 100      | 100           | 100       | 100       |
| <b>'Neutral'</b>            | <b>Mean</b>    | ± 6.165    | ± 6.011  | ± 4.765  | ± 6.292       | ± 6.294   | ± 4.043   |
|                             | <b>SD</b>      | 0.613      | 0.607    | 0.452    | 0.639         | 0.684     | 0.636     |
|                             | <b>Min-Max</b> | 3.7-7.5    | 3.5-7.35 | 3.65-5.7 | 4.08-7.63     | 3.96-7.58 | 2.83-5.71 |
|                             | <b>N</b>       | 100        | 100      | 100      | 100           | 100       | 100       |

SD: Standard Deviation; A: Valence; B: Approach-Avoidance; C: Arousal; Min-Max: Minimum-Maximum value; N= Number of pictures

### **Correlation analyses of emotional dimensions for the groups and categories**

Taking the pictures as cases, we conducted a correlation analyzing using Pearson's correlations to examine the relationships between ratings of valence, arousal, and approach-avoidance for each category and group separately as described in Table III and shown in Figure 2. All dimensions were highly correlated in both the PIGU group and the control group ( $p < .001$ ) as demonstrated in Table III. The control group, however, had a strong negative correlation compared to the PIGU group in all cases, except for the correlations between approach-avoidance and arousal, in which both groups exhibited a strong positive correlation. Correlation coefficients of the control group were also directly compared to those of the addicted group using a calculation for the test of the difference between two independent correlation coefficients (Preacher, 2002). This calculation involves converting the two correlation coefficients into z scores using Fisher's r-to-z transformation. Then, making use of the sample size employed to obtain each coefficient, these z scores are compared using Formula 2.8.5 from Cohen and Cohen (1983, p.54):

$$Z = \frac{Z_1 - Z_2}{SDZ},$$

Where,  $SDZ = \sqrt{\left[ \frac{1}{N_1 - 3} + \frac{1}{N_2 - 3} \right]}$ , and  $N_1$  and  $N_2$  are the sample sizes.

In case of the correlation between emotional valence and arousal, the differences between the PIGU group and control group for the 'Negative Emotional' category showed a strong positive effect ( $z = 4.834$ ,  $p < .001$ , effect size = 0.69) compared to (control group-PIGU group), which showed a strong negative effect ( $z = -4.83$ ). Similarly, in the case of arousal correlated with approach-avoidance, the differences between the PIGU group and control group (PIGU group-control group) for the 'Negative Emotional' category, showed a strong positive correlation ( $z = 4.625$ ,  $p < .001$ , effect size = 0.66) compared to (control group- PIGU group), which showed a

strong negative correlation ( $z=-4.625$ ). For the condition of emotional valence correlated with approach-avoidance differences between the (control group- PIGU group) for the ‘Negative Emotional’ category showed a medium positive correlation ( $z = 2.32$ ,  $p < .001$ , effect size = 0.33) compared to (PIGU group-control group), which showed a medium negative correlation ( $z=-2.32$ ).

**Table 3. Pearson’s correlation of ratings of valence, arousal and approach-avoidance for each category in the target groups**

| Category             | Dimension | PIGU group    |       | Control group |       |
|----------------------|-----------|---------------|-------|---------------|-------|
|                      |           | Pearson’s ‘r’ |       | Pearson’s ‘r’ |       |
|                      |           | C             | A     | C             | A     |
| ‘Negative Emotional’ | A         | -.372*        |       | -.795*        |       |
|                      | B         | -.423*        | .971* | -.806*        | .985* |
| ‘Neutral’            | A         | -.716*        |       | -.895*        |       |
|                      | B         | -.745*        | .944* | -.905*        | .980* |

A: Valence; B: Approach-Avoidance; C: Arousal

\*correlation is significant at  $p<0.05$

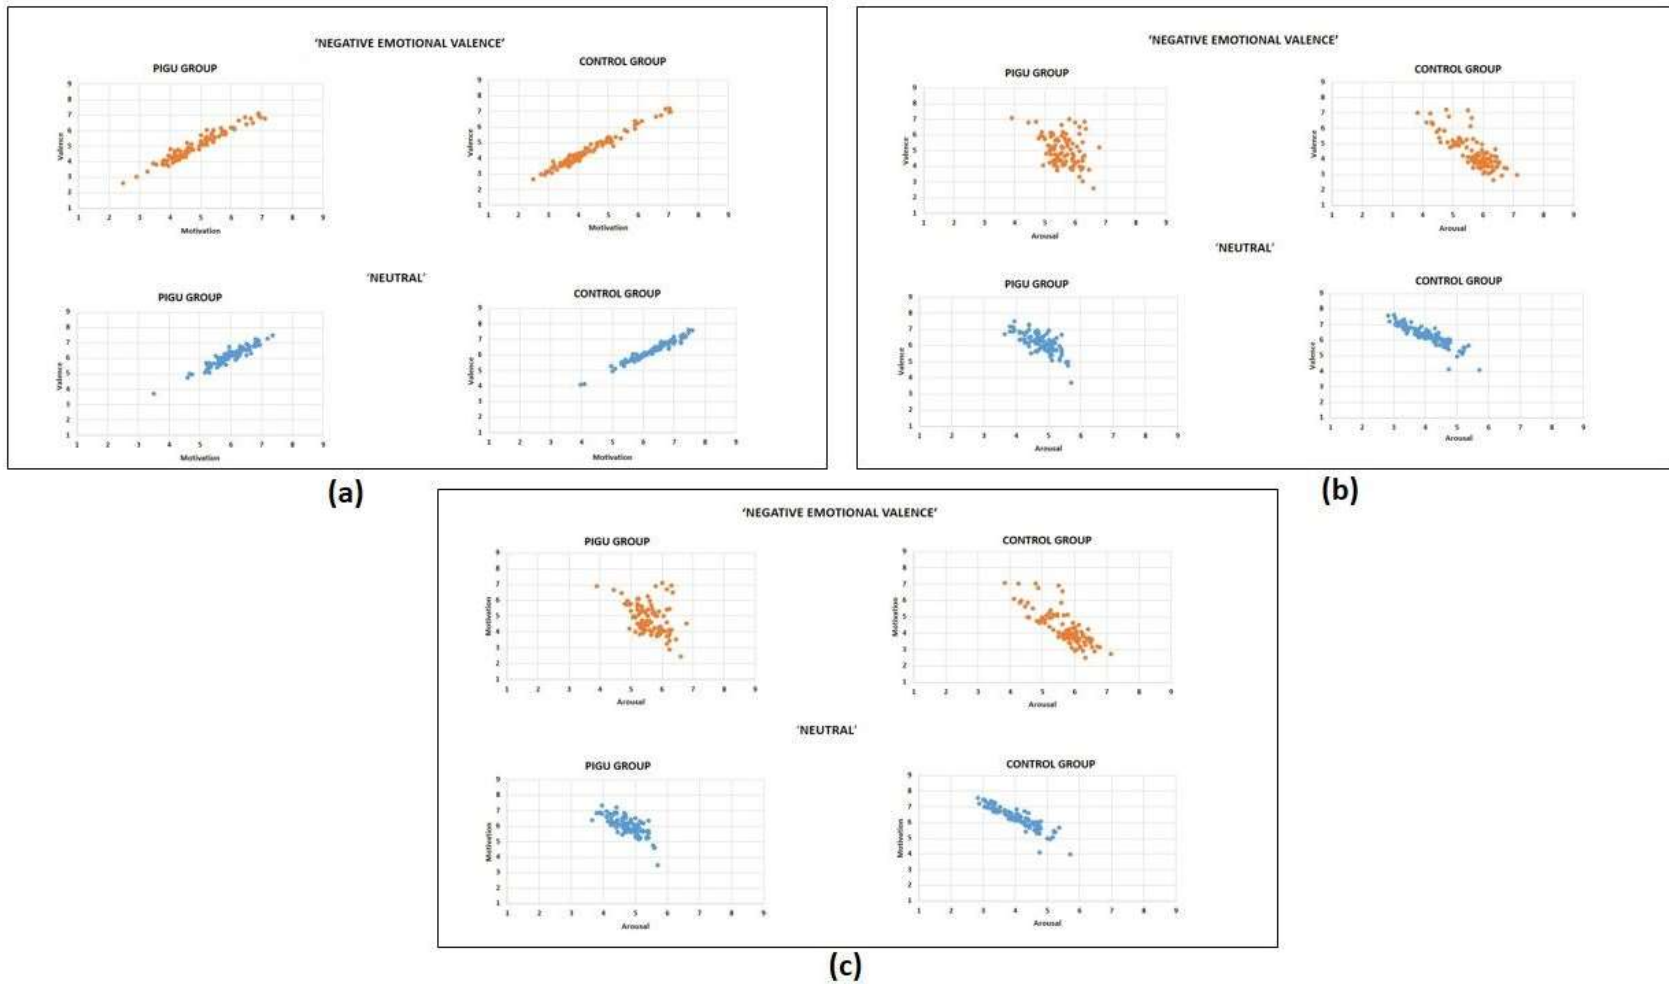

**Figure 2. Graphs depicting the relationship between emotional valence, motivation and arousal as scored by PIGU and control groups (a) Behavioral ratings for valence (y-axis) and arousal (x-axis) in each category for the PIGU and control groups (b) Behavioral ratings for motivation (avoidance to approach) (y-axis) and arousal (x-axis) in each category for the PIGU and control groups (c) Behavioral ratings for valence (y-axis) and motivation (avoidance to approach) (x-axis) in each category for the PIGU and control groups.**

**\* Every single dot represents the mean rating for a particular picture on a two-dimensional scale.**

## Discussion

This study focused on developing and validating visual cues called the ‘Problematic Instagram Use Flashcards’, with the focus on ‘Negative Emotional Valence’ cues to evoke emotional response to risk-taking behaviour among the problematic Instagram users. Conversely, the ‘Neutral’ cues acted as a baseline stimulus to be used as addiction-specific cues in potential future fMRI studies.

In the process of creating this database, we focused on dividing the cues in 2 categories - ‘Negative Emotional’ and ‘Neutral’ cues. The ‘Negative Emotional’ cues included images denoting problematic use of Instagram; such as pictures taken from high altitude, texting while driving, dangerous stunts and loss of an interpersonal relationship, which the PIGUs could perhaps relate to and deem as arousing to them. ‘Neutral’ cues involving nature and objects in grayscale and dull-colored background were used as baseline stimuli. All the pictures in the present database were of good quality with a resolution of 300 dpi. We determined the correlations between emotional valence, arousal, and approach–avoidance for the ‘Negative Emotional’ and ‘Neutral’ categories, as scored by the PIGU and control groups.

The results suggest that there is a distinct profile for PIGU group with regards to their experience of emotions when presented with ‘Negative emotional’ cues that we deem as addiction-specific cues. Taking into account the differences in the correlation coefficients between the 2 groups, together with the scatterplots, correlations between arousal and emotional valence, arousal and avoidance-approach were strongly positive in the PIGU group as compared to the control group for the ‘Negative Emotional’ cues. We found that PIGU subjects compared to the controls were vulnerable to addiction-specific cues and were more frequently aroused by ‘Negative Emotional’

type of stimuli as they frequently used such type of images to receive more ‘likes’ on Instagram. When comparing between emotional valence and motivation among the controls, the pictures in ‘Negative Emotional’ category were rated as unpleasant. Hence, they had perceived it as ‘negative’ and would prefer to ‘avoid’ these cues. In contrast to this, the PIGU subjects had abnormal perception and rated these stimuli to be pleasant. We postulate this to be a result of the abnormally accentuated need to gain popularity and acceptance among their peers that has forced the PIGU subjects to strongly indulge in risk taking behaviors and had increased their motivation to seek risky situations. These findings are in line with the study by Volkow et al. (2010) that observed a greater activation of the motivation circuit upon exposure to drug cues, ultimately resulting in compulsive intake of drugs. In the latter study identified addicted participants showed a tendency towards approaching the ‘Negative Emotional’ cues.

Next, when studying arousal compared with emotional valence, we found that ‘Neutral’ cues did not elicit any excitement or arousal in both the PIGU and the control groups. Interestingly, when presented with ‘Negative Emotional’ cues, both groups reported increased ratings for arousal. This finding is consistent with the studies pertaining to Internet addiction and alcohol addiction, which reported non-addicts can also get aroused in response to the addictive cues (Sinha and Li 2007; Niu et al. 2016). This may be due to the daily use of the social networking application or closely associating this kind of behaviour with themselves, friends or family members (Niu et al. 2016).

Although both groups were aroused during the ‘Negative Emotional’ cues, we observed that the mean rating of arousal in the control group was greater than that of the PIGU subjects. This is because the controls are not frequently exposed to risk-taking behaviours. Thus, when confronted



with 'Negative Emotional' cues, which are considered "taboo", socially unacceptable and should be discouraged, they found it exciting (Duncan and Petosa 1994). Nevertheless, they correctly responded by avoiding such cues. As anticipated, the PIGU subjects were also aroused by these images and tended to respond by approaching these cues. Nevertheless, a few participants showed reduced arousal, which we speculate may be due to their over-involvement in extreme levels of risk-taking behavior leading to the development of tolerance. In view of their chronic exposure to such content in their Instagram account, the PIGU group are postulated to become very aroused to extremely 'Negative Emotional' kind of images and will approach the 'Negative Emotional' cues.

Lastly, age difference has a significant role in processing of emotional stimuli. Age can also influence the degree of arousal and hence can affect the brain activation in fMRI studies. Previous studies have found that older people, middle-aged people and younger adults differ in perception and processing of emotional stimuli. Study by Grühn and Scheibe (2008) found older people compared to the young adults overrate emotional valence and arousal dimensions (Grühn and Scheibe 2008). Whereas Gilet, Grühn (2012) reported middle-aged people showed intense mean ratings for positive pictures compared to older people (Gilet et al. 2012). Thus, to avoid any bias and disputes, we limited the study to undergraduate students of similar age group in a public university in Malaysia (mean age= 21.8 years).

These results suggest that PIGU can produce long term alterations in the way the users experience emotions when presented with 'Negative emotional' cues. The decision-making towards 'Negative emotional' cues was "stronger" among the control group to guide them towards adaptive objectives, rather than towards 'Negative emotional' cues as observed among the PIGU subjects. Furthermore,

neuroimaging studies have highlighted the role of emotional markers in decision-making (Bechara 2004; Bechara et al. 2002). Prefrontal cortex (PFC) is a key brain area responsible for decision-making to find solutions in a given task and decides whether to 'go' towards or to 'inhibit' a stimuli. In agreement with these studies, the decision-making in the PIGU group was affected when presented with 'Negative emotional' cues due to inability to exhibit an inhibitory response to such stimuli (Syed Nasser, Ahmad Saad, et al. 2019). This study helps to explain why the 'Negative emotional' cues associated with Instagram usage increases the motivational behaviour of the PIGU group towards such stimuli as opposed to the control group. This inability to regulate ones control towards negative behavior may lead to distorted perception of social norms.

From a set of 100 pictures in each category, we finally selecting 20 'Negative Emotional' and 20 'Neutral' pictures. The suitable 'Negative Emotional' pictures were selected on the basis that the pictures elicited a positive feeling and arousal and a tendency to approach among the PIGU subjects, while the same pictures rated as negative and induced a tendency to avoid among the control group. The pleasant, un-arousing pictures in both groups were selected as suitable 'Neutral' stimuli. The appropriate cues selected based on this validation study will enable the researchers to identify the regional brain activation in meso-corticolimbic system in future fMRI studies.

One limitation of the study is the small sample size and limited theme of stimuli. Further validation of this picture database employing computerized SAM or the slider scale methodology is recommended. Additionally, as we had conducted an online survey, we are unsure regarding the exact time the subjects actually took to answer each question. An additional minor limitation of this present study is the lack of very negative (low emotional valence) pictures with high

avoidance-approach outcome.

### **Conclusion**

A validated database of flashcard images pertaining to problematic Instagram usage has been created to potentiate future fMRI 'Response to Reward' cue-induced reactivity studies. The database offers high-resolution addiction-specific cues that could potentially activate the meso-corticolimbic reward system of the brain when performing fMRI. Images from our database will be made available to interested researchers upon request made to the corresponding author.

### **Acknowledgements**

This study was funded by Universiti Putra Malaysia research grants, Geran Putra (GP-IPS/2017/9580800 and GP/2017/9549800) awarded to Associated Professor Dr. Subapriya Suppiah. All the authors declare that there is no conflict of interest in the publication of this research. The authors would like to thank the students from different faculties of UPM who participated in this study.

### **References**

- American Psychiatric Association. 2013. *Diagnostic and Statistical Manual of Mental Disorders*. 5 ed.
- Bechara, A. 2004. "The role of emotion in decision-making: Evidence from neurological patients with orbitofrontal damage." *Brain and Cognition* 55 (1): 30-40.
- Bechara, A., Dolan, S., and Hinds, A. 2002. "Decision-making and addiction (part II): myopia for the future or hypersensitivity to reward?" *Neuropsychologia* 40 (10): 1690-1705.

- Billieux, J. 2012. "Problematic use of the mobile phone: A literature review and a pathways model." *Current Psychiatry Reviews* 8 (4): 299-307.
- Brand, M., Young, K.S., Laier, C., Wölfling, K., and Potenza, M.N. 2016. "Integrating psychological and neurobiological considerations regarding the development and maintenance of specific Internet-use disorders: An Interaction of Person-Affect-Cognition-Execution (I-PACE) model." *Neuroscience & Biobehavioral Reviews* 71: 252-266.
- Capra, F. 1996. *The web of life: A new scientific understanding of living systems*. New York: Anchor Books.
- Chakraborty, A. 2016. "Facebook Addiction: An Emerging Problem." *American Journal of Psychiatry Residents' Journal* 11 (12): 7-9.
- Ching, S.M., Yee, A., Ramachandran, V., Sazlly Lim, S.M., Wan Sulaiman, W.A., Foo, Y.L., and Hoo, F.k. 2015. "Validation of a Malay Version of the Smartphone Addiction Scale among Medical Students in Malaysia." *PLOS ONE* 10 (10): e0139337.
- Duncan, D., and Petosa, R. 1994. "Social and Community Factors Associated with Drug Use and Abuse Among Adolescents."
- Feldman-Barrett, L., Mesquita, B., Ochsner, K.N., and Gross, J.J. 2006. "The Experience of Emotion." *Annual Review of Psychology* 58 (1): 373-403.
- Gilet, A.L., Grünh, D., Studer, J., and Labouvie-Vief, G. 2012. "Valence, arousal, and imagery ratings for 835 French attributes by young, middle-aged, and older adults: The French Emotional Evaluation List (FEEL)." *Revue Européenne de Psychologie Appliquée/European Review of Applied Psychology* 62 (3): 173-181.
- Glover, G.H. 2011. "Overview of functional magnetic resonance imaging." *Neurosurgery clinics of North America* 22 (2): 133-vii.

- Grühn, D., and Scheibe, S. 2008. *Age-related differences in valence and arousal ratings of pictures from the International Affective Picture System (IAPS): Do ratings become more extreme with age?* Vol. 40.
- Huettel, S.A., Song, A.W., and McCarthy, G. 2014. *Functional Magnetic Resonance Imaging*. 3 ed.: Sinauer Associates.
- James, J.S., Rajesh, P., Chandran, A.V., and Kesavadas, C. 2014. "fMRI paradigm designing and post-processing tools." *The Indian journal of radiology & imaging* 24 (1): 13-21.
- Kather, J.N., Weidner, A., Attenberger, U., Bukschat, Y., Weis, C.-A., Weis, M., Schad, L.R., and Zöllner, F.G. 2017. "Color-coded visualization of magnetic resonance imaging multiparametric maps." *Scientific Reports* 7: 41107.
- Khalid, N.L., Jayasainan, S.Y., and Hassim, N. 2018. "Social media influencers - shaping consumption culture among Malaysian youth." *SHS Web Conf.* 53: 02008.
- Kim, J.E., Son, J.W., Choi, W.H., Kim, Y.R., Oh, J.H., Lee, S., and Kim, J.K. 2014. "Neural responses to various rewards and feedback in the brains of adolescent Internet addicts detected by functional magnetic resonance imaging." *Psychiatry Clin Neurosci* 68 (6): 463-70.
- Ko, C.H., Liu, G.C., Hsiao, S., Yen, J.Y., Yang, M.J., Lin, W.C., Yen, C.F., and Chen, C.S. 2009. "Brain activities associated with gaming urge of online gaming addiction." *Journal of Psychiatric Research* 43 (7): 739-747.
- Lindquist, M.A., Meng Loh, J., Atlas, L.Y., and Wager, T.D. 2009. "Modeling the hemodynamic response function in fMRI: efficiency, bias and mis-modeling." *NeuroImage* 45 (1 Suppl): S187-S198.
- Marchewka, A., Zurawski, L., Jednorog, K., and Grabowska, A. 2014. "The Nencki Affective

- Picture System (NAPS): introduction to a novel, standardized, wide-range, high-quality, realistic picture database." *Behav Res Methods* 46 (2): 596-610.
- Mauss, I.B., and Robinson, M.D. 2009. "Measures of emotion: A review." *Cognition & emotion* 23 (2): 209-237.
- Niu, G.-F., Sun, X.-J., Subrahmanyam, K., Kong, F.-C., Tian, Y., and Zhou, Z.-K. 2016. "Cue-induced craving for Internet among Internet addicts." *Addictive Behaviors* 62: 1-5.
- Robinson, T.E., and Berridge, K.C. 2008. "Review. The incentive sensitization theory of addiction: some current issues." *Philosophical transactions of the Royal Society of London. Series B, Biological sciences* 363 (1507): 3137-3146.
- Sharifat, H., Rashid, A.A., and Suppiah, S. 2018. "Systematic review of the utility of functional MRI to investigate internet addiction disorder: Recent updates on resting state and task-based fMRI." *Malaysian Journal of Medicine and Health Sciences* 14 (1): 21-33.
- Sherman, L.E., Greenfield, P.M., Hernandez, L.M., and Dapretto, M. 2018. "Peer Influence Via Instagram: Effects on Brain and Behavior in Adolescence and Young Adulthood." *Child Dev* 89 (1): 37-47.
- Sherman, L.E., Payton, A.A., Hernandez, L.M., Greenfield, P.M., and Dapretto, M. 2016. "The Power of the Like in Adolescence: Effects of Peer Influence on Neural and Behavioral Responses to Social Media." *Psychological Science* 27 (7): 1027-1035.
- Sinha, R., and Li, C.S.R. 2007. "Imaging stress- and cue-induced drug and alcohol craving: association with relapse and clinical implications." *Drug and Alcohol Review* 26 (1): 25-31.
- Sun, Y., Ying, H., Seetohul, R.M., Xuemei, W., Ya, Z., Qian, L., Guoqing, X., and Ye, S. 2012. "Brain fMRI study of crave induced by cue pictures in online game addicts (male

adolescents)." *Behav Brain Res* 233 (2): 563-76.

Syed Nasser, N., Ahmad Saad, F.F., Abdul Rashid, A., Abdul Aziz, A.F., Mustafa, S., Sharifat, H., Tyagi, R., Abd Rashid, A.F., Loh, J.L., Mohamad, M., and Suppiah, S. 2019. "The objective assessment of the effects on cognition functioning among military personnel exposed to hypobaric-hypoxia: A pilot fMRI study." *Medical Journal of Malaysia*.

Syed Nasser, N., Loh, J.L., Abdul Rashid, A., Sharifat, H., Ab Hamid, S., Abdul Rahim, E., Ng Andrew, B., Mustafa, S., Ching, S.M., and Suppiah, S. 2019. "Assessment of problematic Facebook use among undergraduate students in UPM correlated with depression, anxiety and stress " *International Journal of Public Health and Clinical Sciences* 6 (4): 113-132.

Volkow, N.D., Koob, G.F., and McLellan, A.T. 2016. "Neurobiologic Advances from the Brain Disease Model of Addiction." *N Engl J Med* 374 (4): 363-71.

Volkow, N.D., Wang, G.-J., Fowler, J.S., Tomasi, D., Telang, F., and Baler, R. 2010. "Addiction: decreased reward sensitivity and increased expectation sensitivity conspire to overwhelm the brain's control circuit." *BioEssays : news and reviews in molecular, cellular and developmental biology* 32 (9): 748-755.

Zhang, J.T., Yao, Y.W., Potenza, M.N., Xia, C.C., Lan, J., Liu, L., Wang, L.J., Liu, B., Ma, S.S., and Fang, X.Y. 2016. "Effects of craving behavioral intervention on neural substrates of cue-induced craving in Internet gaming disorder." *Neuroimage Clin* 12: 591-599.
